# Supplementary material for: Opposing effects of BRCA1 mRNA expression on patient survival in breast and colorectal cancer and variations among African American, Asian, and younger patients
Source: PubMed Central journal article supplement (PMC8487727; doi:10.18632/oncotarget.28082), 2021-09-28
Supplement: oncotarget-12-1992-s001.pdf [file oncotarget-12-1992-s001.pdf]

## Opposing effects of BRCA1 mRNA expression on patient survival in breast and colorectal cancer and variations among African American, Asian, and younger patients

### SUPPLEMENTARY MATERIALS

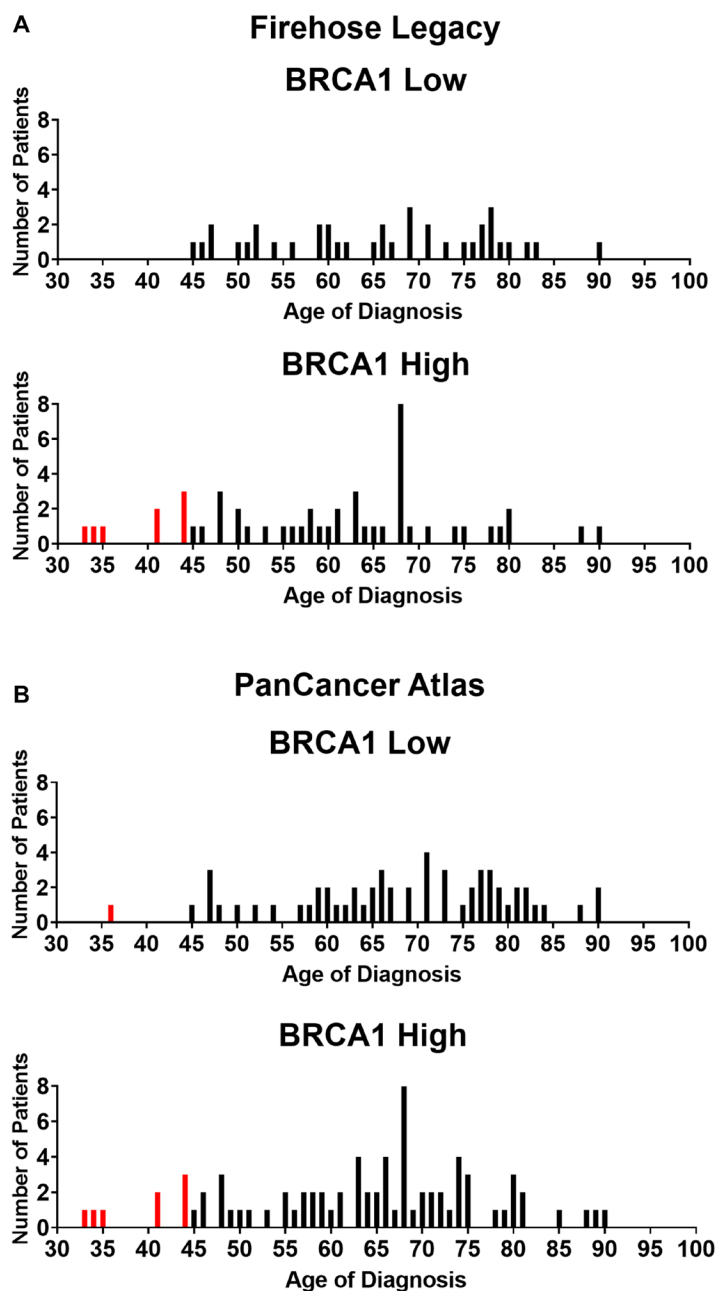

**Supplementary Figure 1: Frequency of young (<45 year old) patients is higher in BRCA1 high vs. BRCA1 low colorectal cancer.** Patients in two TCGA databases (Firehose Legacy and PanCancer Atlas) were separated based on BRCA1 mRNA expression (low =  $\leq -1.29$  standard deviation from the mean of all samples; high =  $\geq 1.05$  standard deviation from the mean of all samples). The ages of patients in these groups are shown with patients <45 years old indicated in red.

**Supplementary Table 1: Contingency tables used to calculate statistical significance of the correlation between BRCA1 levels and frequency of African American patients/BC subtype (top) or age of CRC diagnosis (bottom) using a Fisher's Exact Test**

| <b>BC PanCancer Atlas</b>     |                                        |                                         |
|-------------------------------|----------------------------------------|-----------------------------------------|
| BC Subtype                    | Patients with low BRCA1 mRNA           | Patients with high BRCA1 mRNA           |
| Basal                         | 29                                     | 25                                      |
| Non-basal                     | 46                                     | 113                                     |
| <i>p</i> -value = 0.0016      |                                        |                                         |
| Race                          | Patients with low BRCA1 mRNA           | Patients with high BRCA1 mRNA           |
| Black or African American     | 21                                     | 18                                      |
| Non-black or African American | 61                                     | 111                                     |
| <i>p</i> -value = 0.0448      |                                        |                                         |
| <b>CRC Firehose Legacy</b>    |                                        |                                         |
| Age of Diagnosis              | Number of patients with low BRCA1 mRNA | Number of patients with high BRCA1 mRNA |
| <45                           | 0                                      | 8                                       |
| >45                           | 38                                     | 42                                      |
| <i>p</i> -value = 0.0091      |                                        |                                         |
| <b>CRC PanCancer Atlas</b>    |                                        |                                         |
| Age of Diagnosis              | Number of patients with low BRCA1 mRNA | Number of patients with high BRCA1 mRNA |
| <45                           | 1                                      | 8                                       |
| >45                           | 56                                     | 69                                      |
| <i>p</i> -value = 0.0778      |                                        |                                         |

Some patients do not have data on subtype or race and were excluded in this analysis.

**Supplementary Table 2: Frequency of BRCA1, BRCA2, p21, Rb low/high expression and TP53, ATM mutations in BC and CRC patient cohorts**

| CRC Firehose Legacy |              |              |               |              |              |              |              |              |              |              |
|---------------------|--------------|--------------|---------------|--------------|--------------|--------------|--------------|--------------|--------------|--------------|
| Age                 | BRCA1        |              | BRCA2         |              | p21          |              | Rb           |              |              |              |
|                     | mRNA Low     | mRNA High    | mRNA Low      | mRNA High    | mRNA Low     | mRNA High    | mRNA Low     | mRNA High    |              |              |
| <45 (n = 8)         | 0/8 (0%)     | 8/8 (100%)   | 0/8 (0%)      | 6/8 (75%)    | 3/8 (38%)    | 1/8 (13%)    | 2/8 (25%)    | 1/8 (13%)    |              |              |
| >45 (n = 80)        | 38/80 (48%)  | 42/80 (53%)  | 18/80 (23%)   | 20/80 (25%)  | 13/80 (16%)  | 13/80 (16%)  | 12/80 (15%)  | 11/80 (14%)  |              |              |
| CRC PanCancer Atlas |              |              |               |              |              |              |              |              |              |              |
| Age                 | BRCA1        |              | BRCA2         |              | p21          |              | Rb           |              | TP53         | ATM          |
|                     | mRNA Low     | mRNA High    | mRNA Low      | mRNA High    | mRNA Low     | mRNA High    | mRNA Low     | mRNA High    | Mutated      | Mutated      |
| <45 (n = 9)         | 1/9 (11%)    | 8/9 (89%)    | 1/9 (11%)     | 5/9 (56%)    | 3/9 (33%)    | 0/9 (0%)     | 3/9 (33%)    | 0/9 (0%)     | 8/9 (89%)    | 1/9 (11%)    |
| ≥45 (n = 125)       | 56/125 (45%) | 69/125 (55%) | 29/125 (23%)  | 25/125 (20%) | 19/125 (15%) | 21/125 (17%) | 22/125 (18%) | 22/125 (18%) | 70/110 (64%) | 14/110 (13%) |
| BC PanCancer Atlas  |              |              |               |              |              |              |              |              |              |              |
| BRCA1               |              |              |               |              | BRCA2        |              |              |              |              |              |
| mRNA Low            |              |              | mRNA High     |              | mRNA Low     |              |              | mRNA High    |              |              |
| 85/233 (36%)        |              |              | 148/233 (64%) |              | 41/233 (18%) |              |              | 65/233 (28%) |              |              |

Frequency of TP53 and ATM mutations are included for the PanCancer Atlas database (all 9 patients <45 years old were profiled for mutations, and 110/125 patients >45 years old were profiled for mutations). BRCA1 low/high expression is defined as <-1.29/>1.05 standard deviation from the mean, respectively. BRCA2, p21, and Rb low/high expression is defined as <-1/>1 standard deviation from the mean, respectively.
